# Supplementary material for: Biomodex patient-specific brain aneurysm models: the value of simulation for first in-human experiences using new devices and robotics
Source: PubMed Central journal article supplement — J Neurointerv Surg. 2020 Jun 29;13(3):272–7. doi: 10.1136/neurintsurg-2020-015990 (PMC7892376; doi:10.1136/neurintsurg-2020-015990), 2020-06-29
Supplement: neurintsurg-2020-015990supp001.pdf [file neurintsurg-2020-015990supp001.pdf]

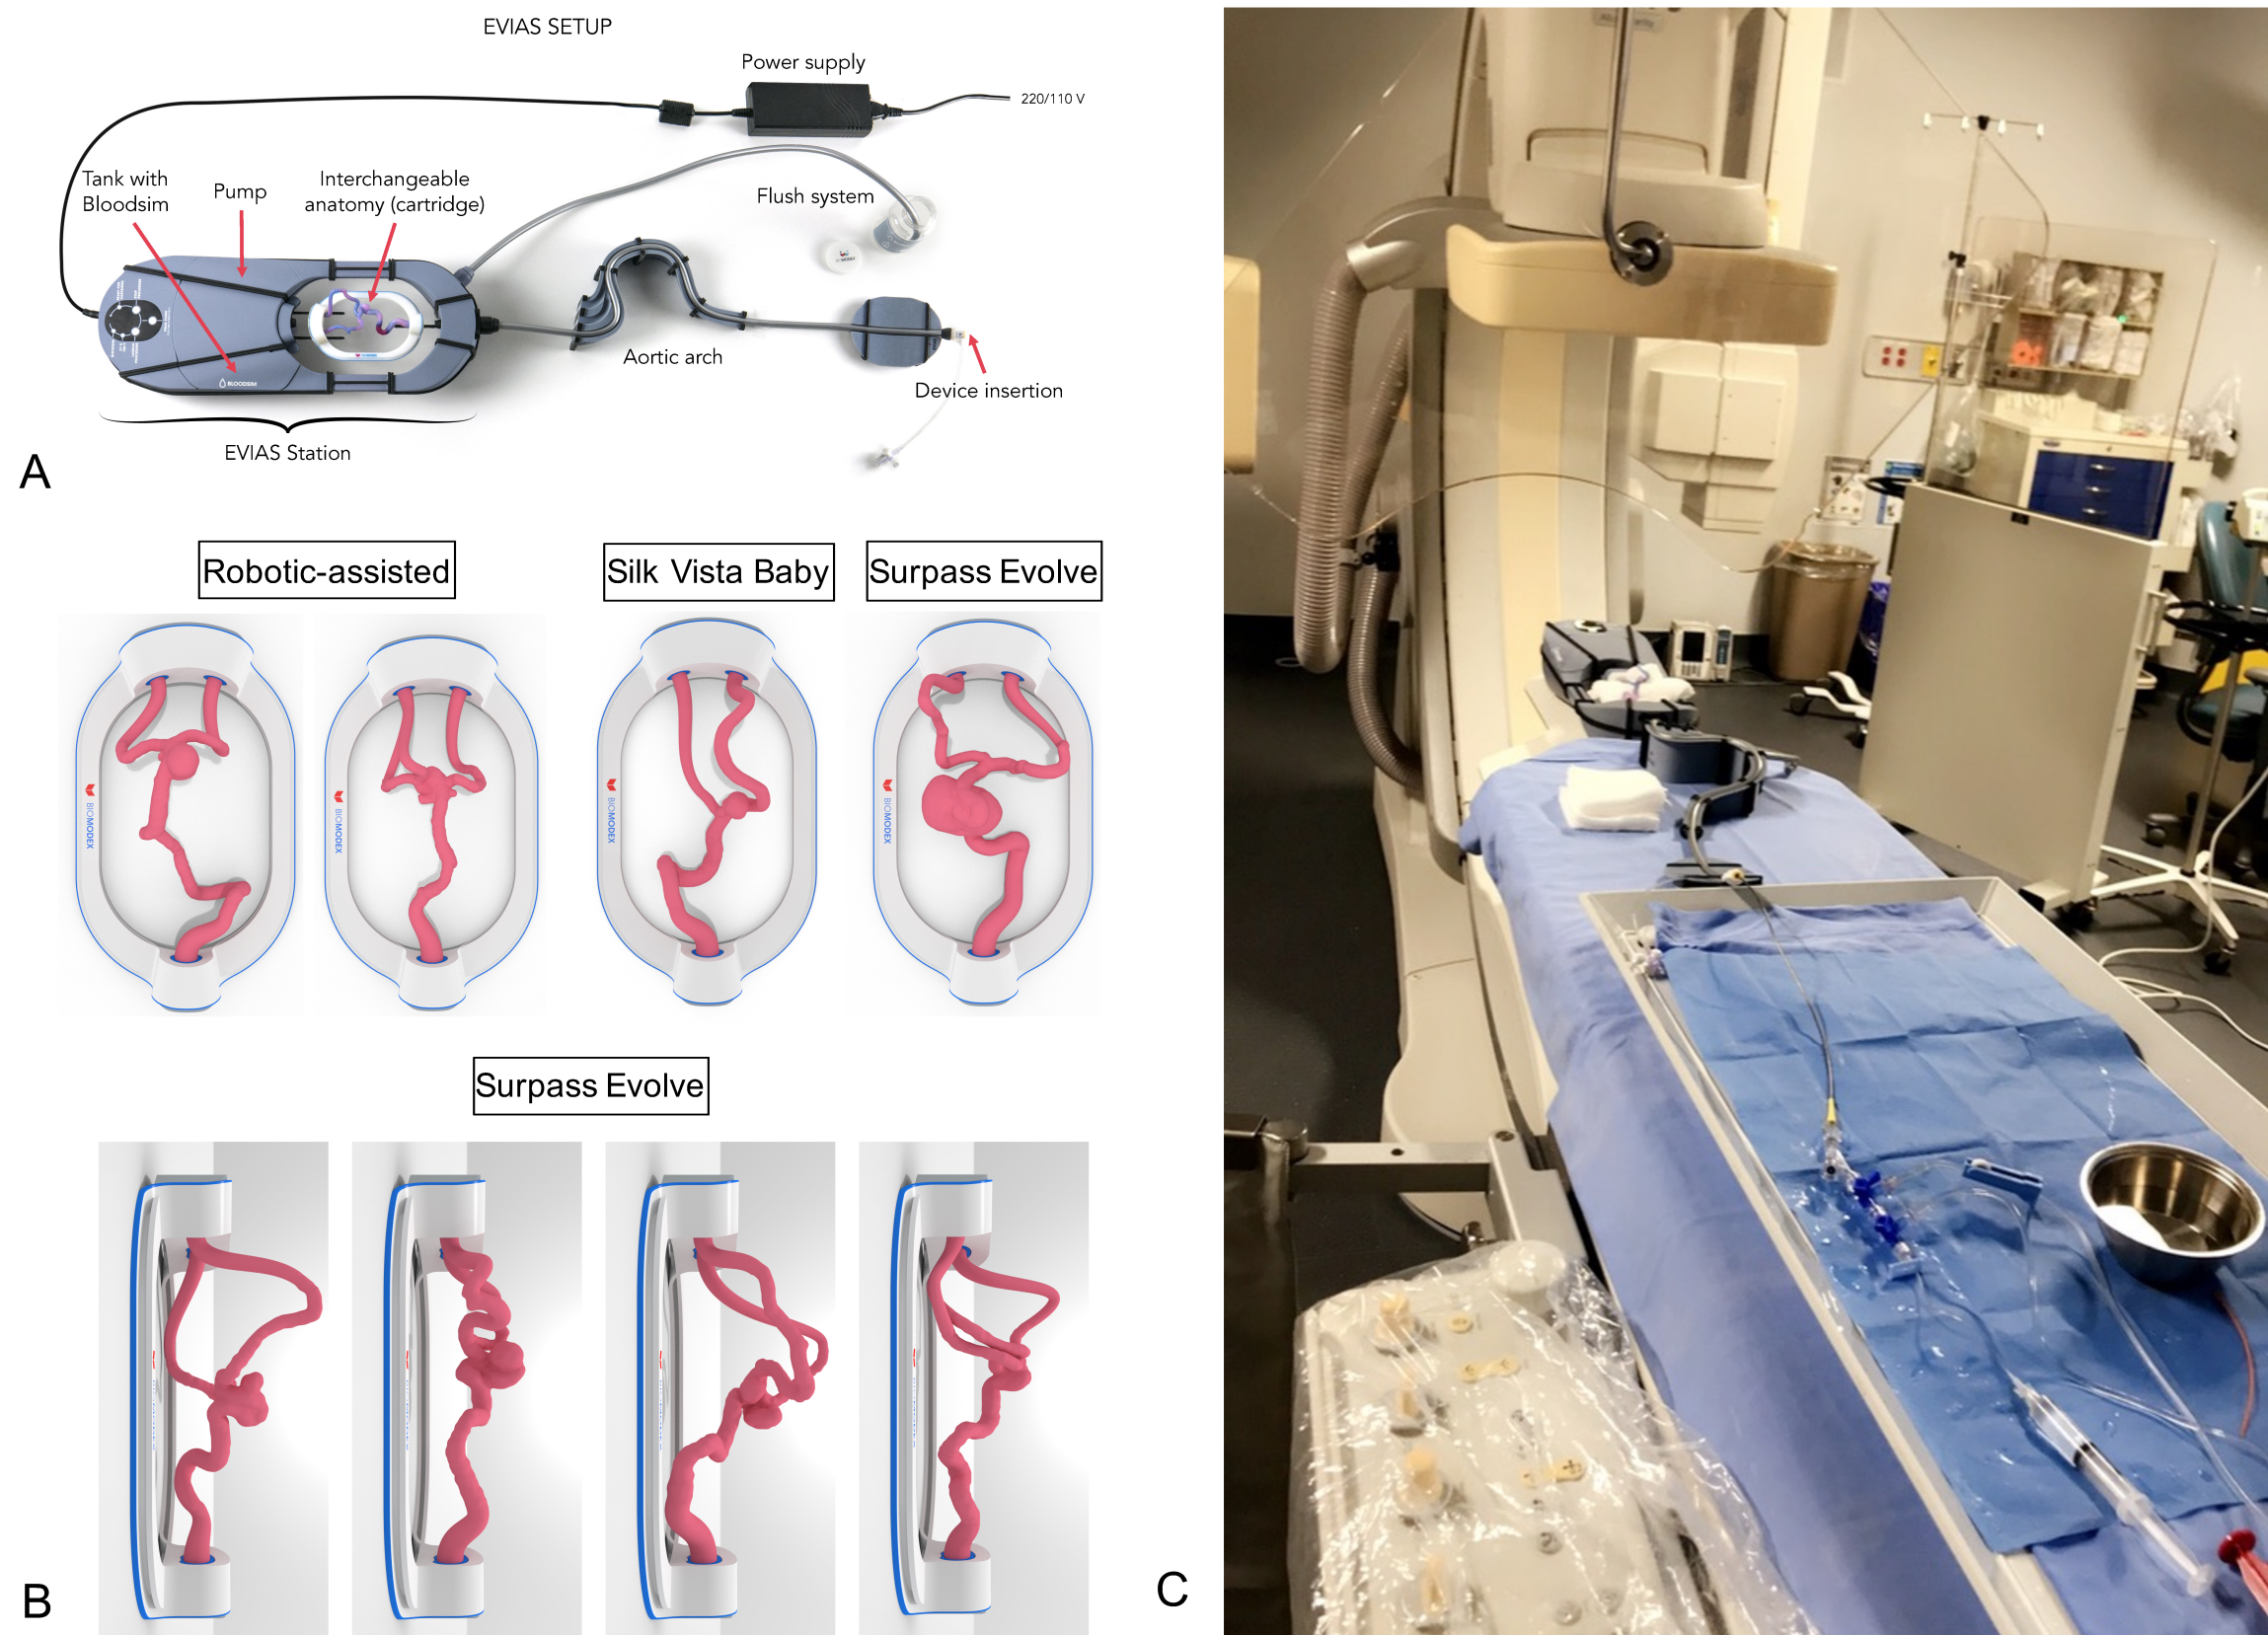

**Supplemental Figure 1** – (A) EVIAS (Endovascular Intracranial Aneurysm System) station components. (B) Interchangeable cartridges with 3D-printed patient-specific intracranial aneurysm models used in this study, treated either robotically or with novel flow diverting stents. (C) The in vitro model set-up in the angiosuite simulates the clinical procedures.
